# Supplementary material
Source: PubMed Central journal article supplement (PMC3545295)

Figure 3C

C

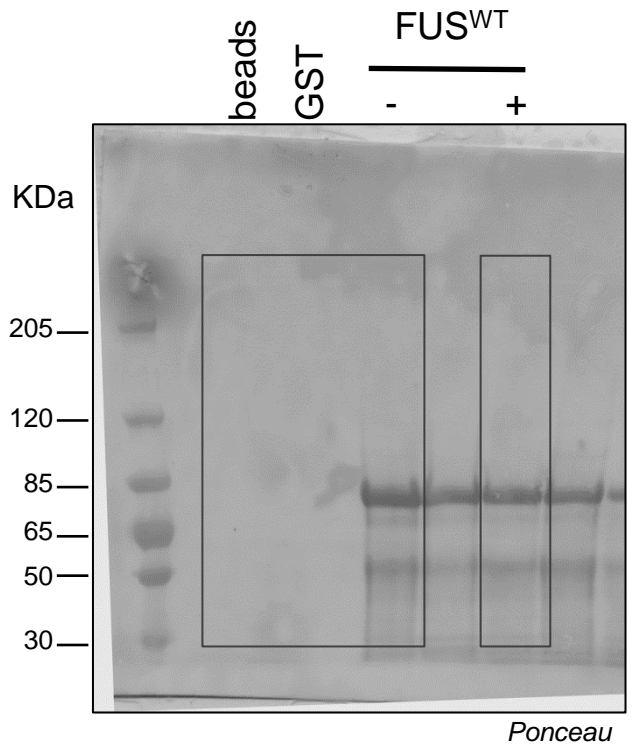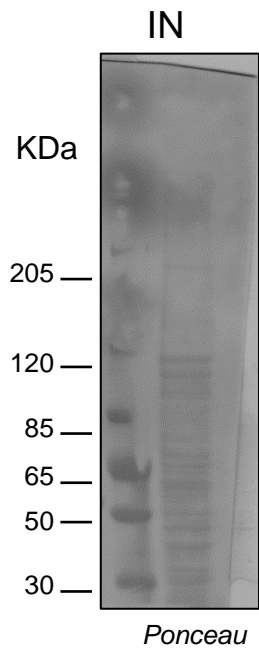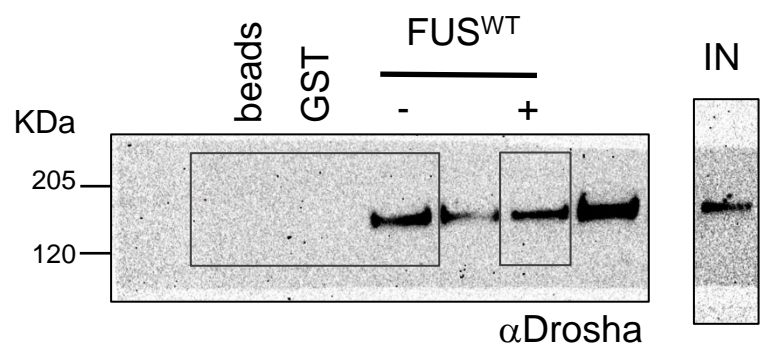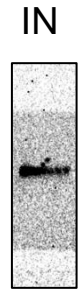

Supplement: emboj2012319s10.pdf [file emboj2012319s10.pdf]

**Figure 4A and 4B**

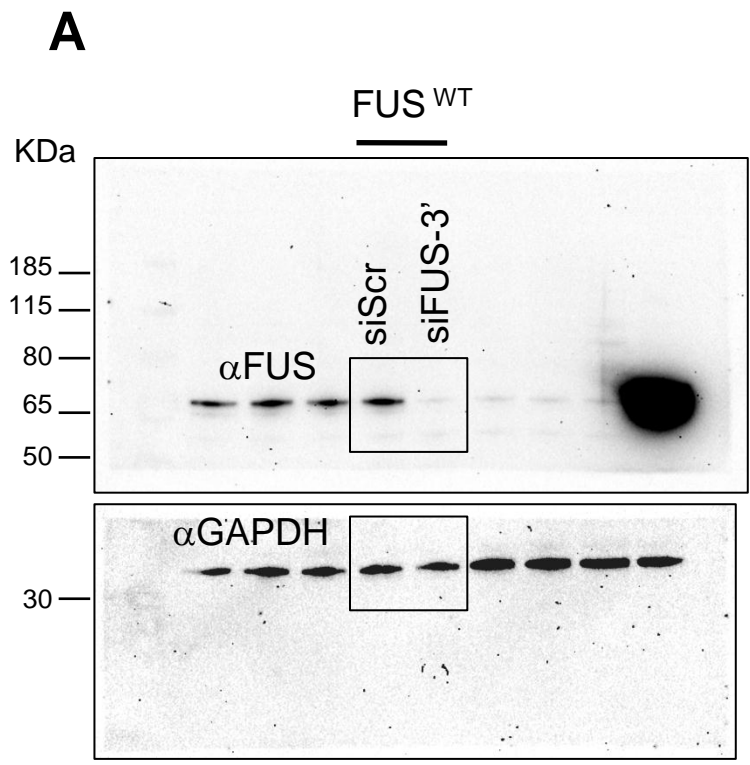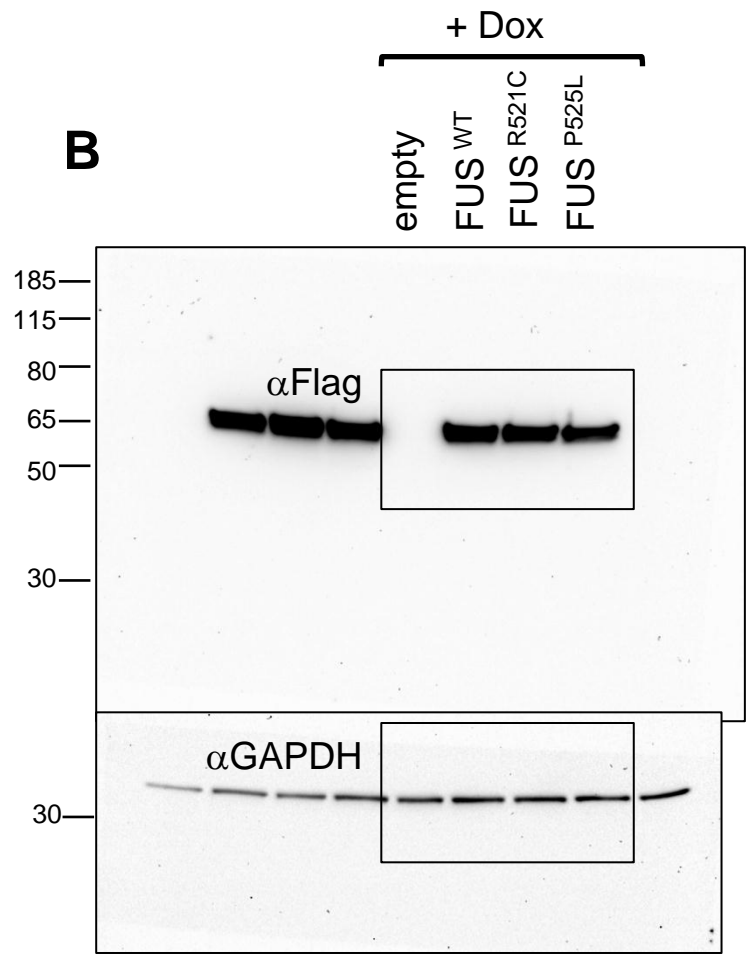

Supplement: emboj2012319s11.pdf [file emboj2012319s11.pdf]

Figure 6A

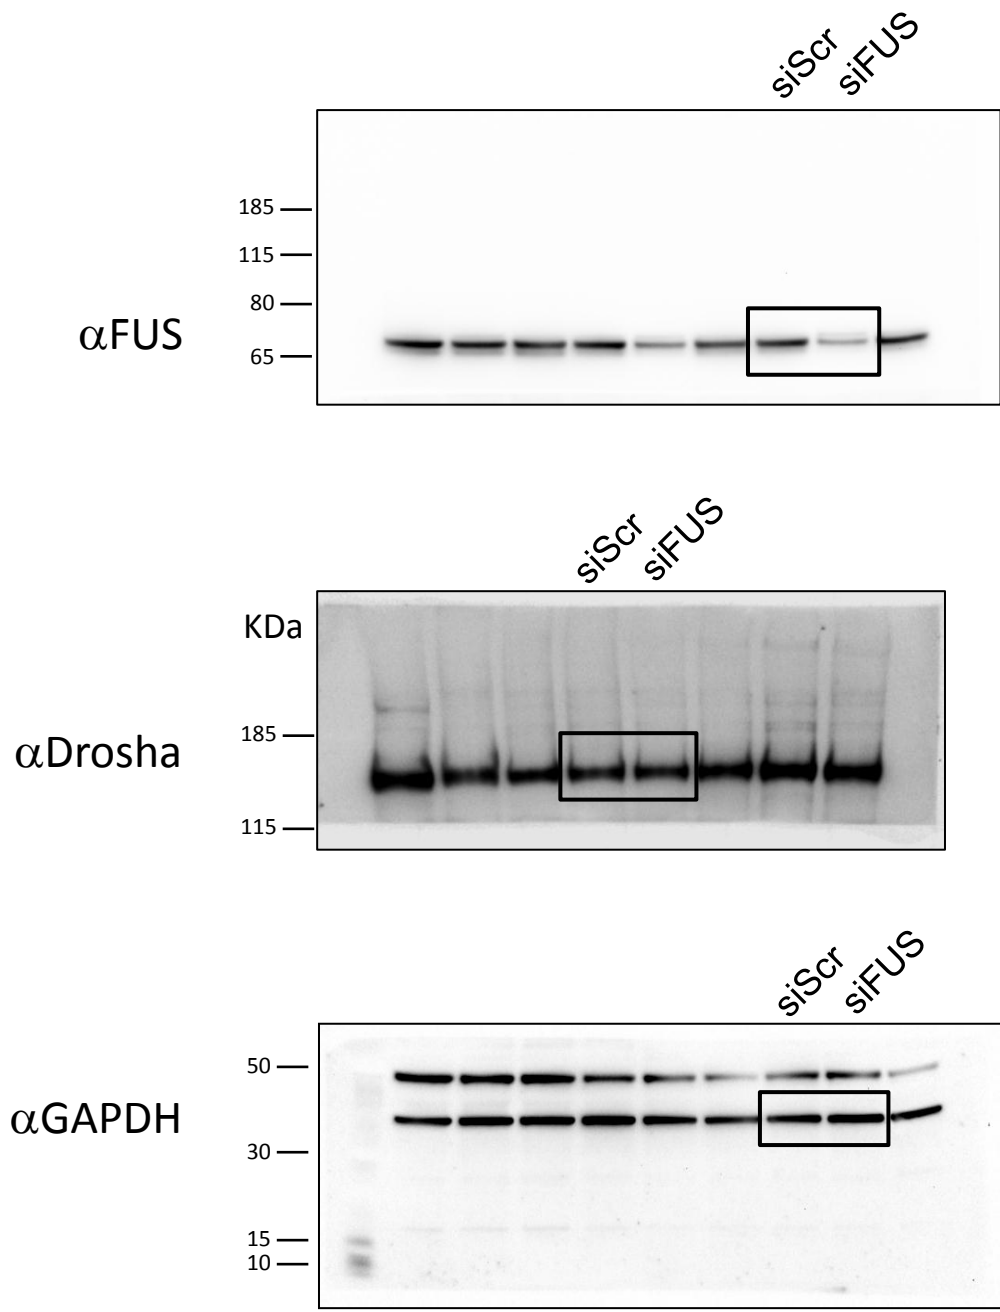

Supplement: emboj2012319s12.pdf [file emboj2012319s12.pdf]

**Figure 1A**

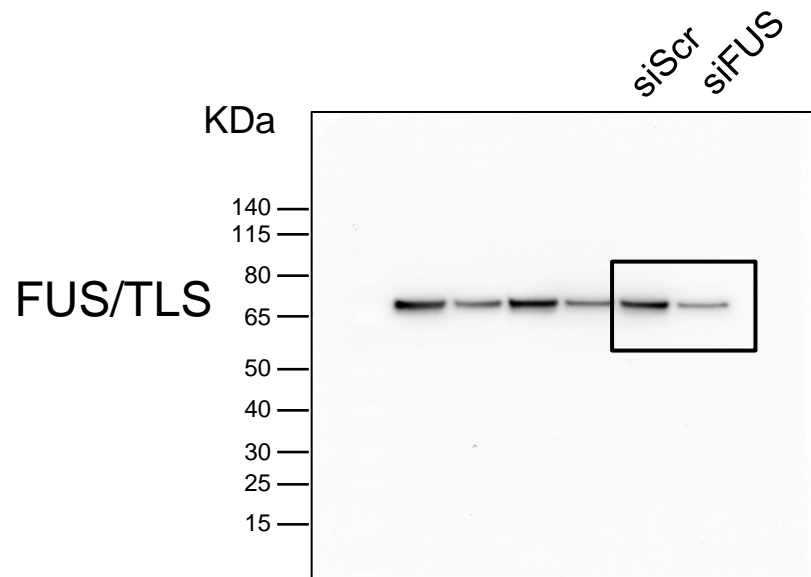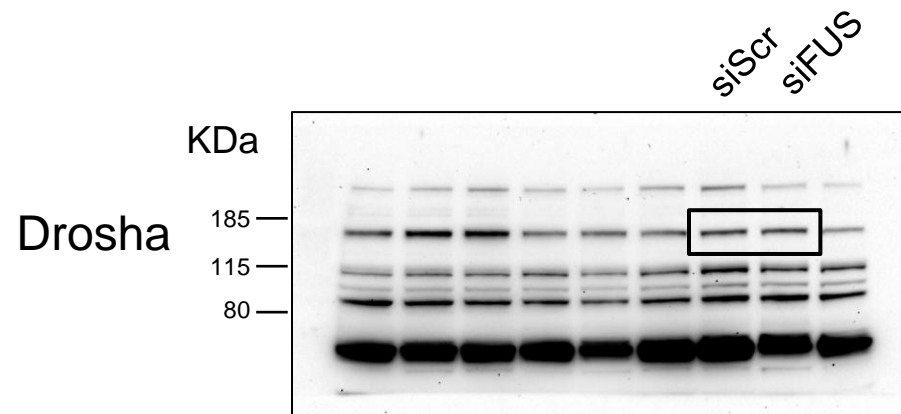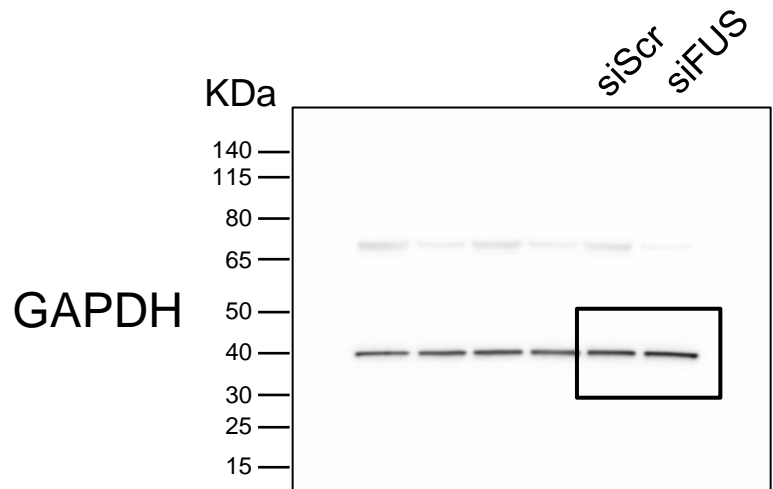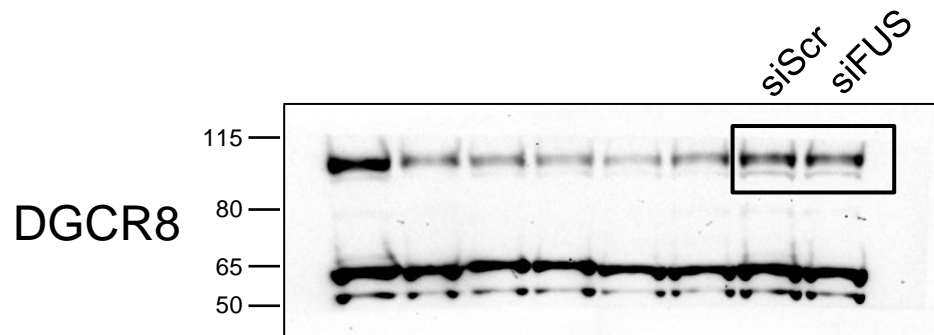

Supplement: emboj2012319s4.pdf [file emboj2012319s4.pdf]

**Figure 1C**

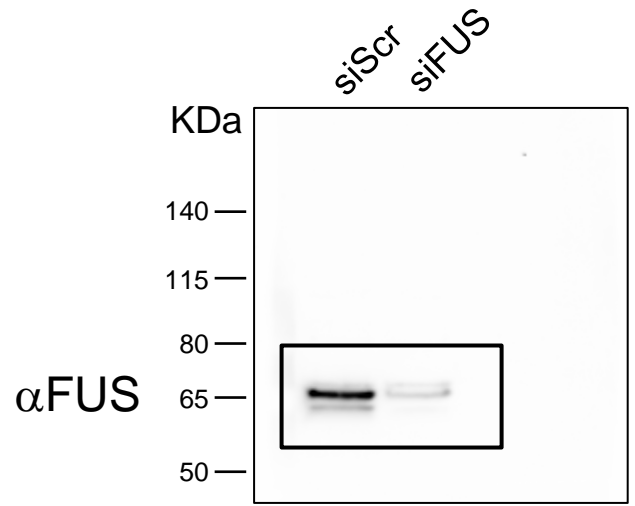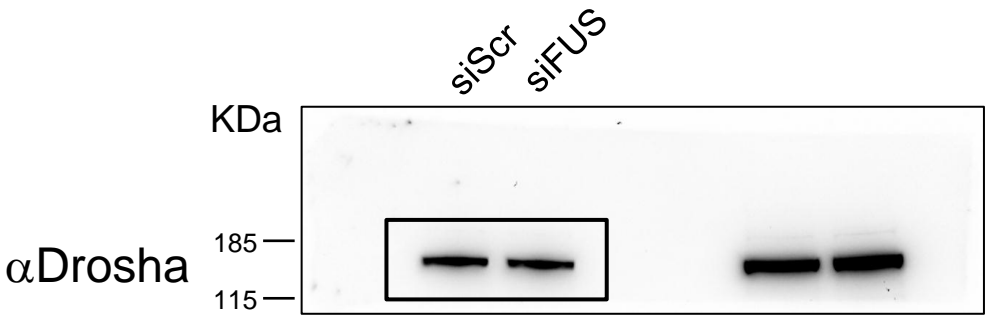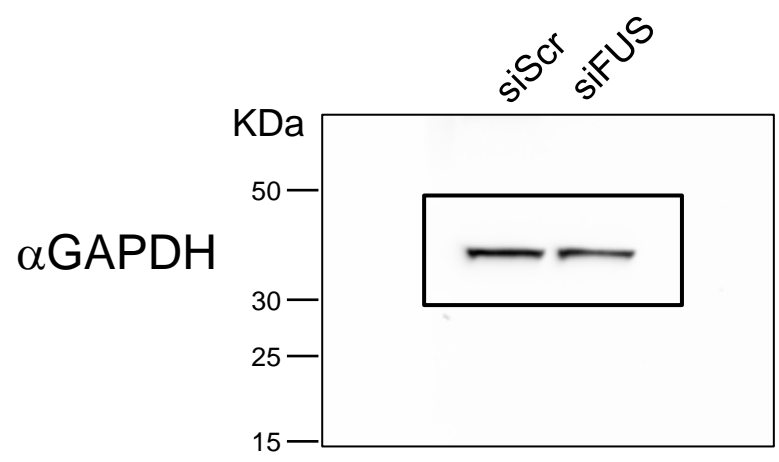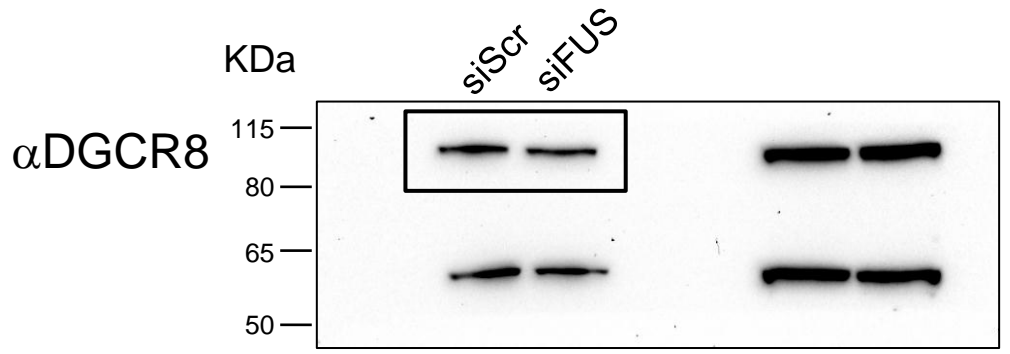

Supplement: emboj2012319s5.pdf [file emboj2012319s5.pdf]

**Figure 2A**

**A**

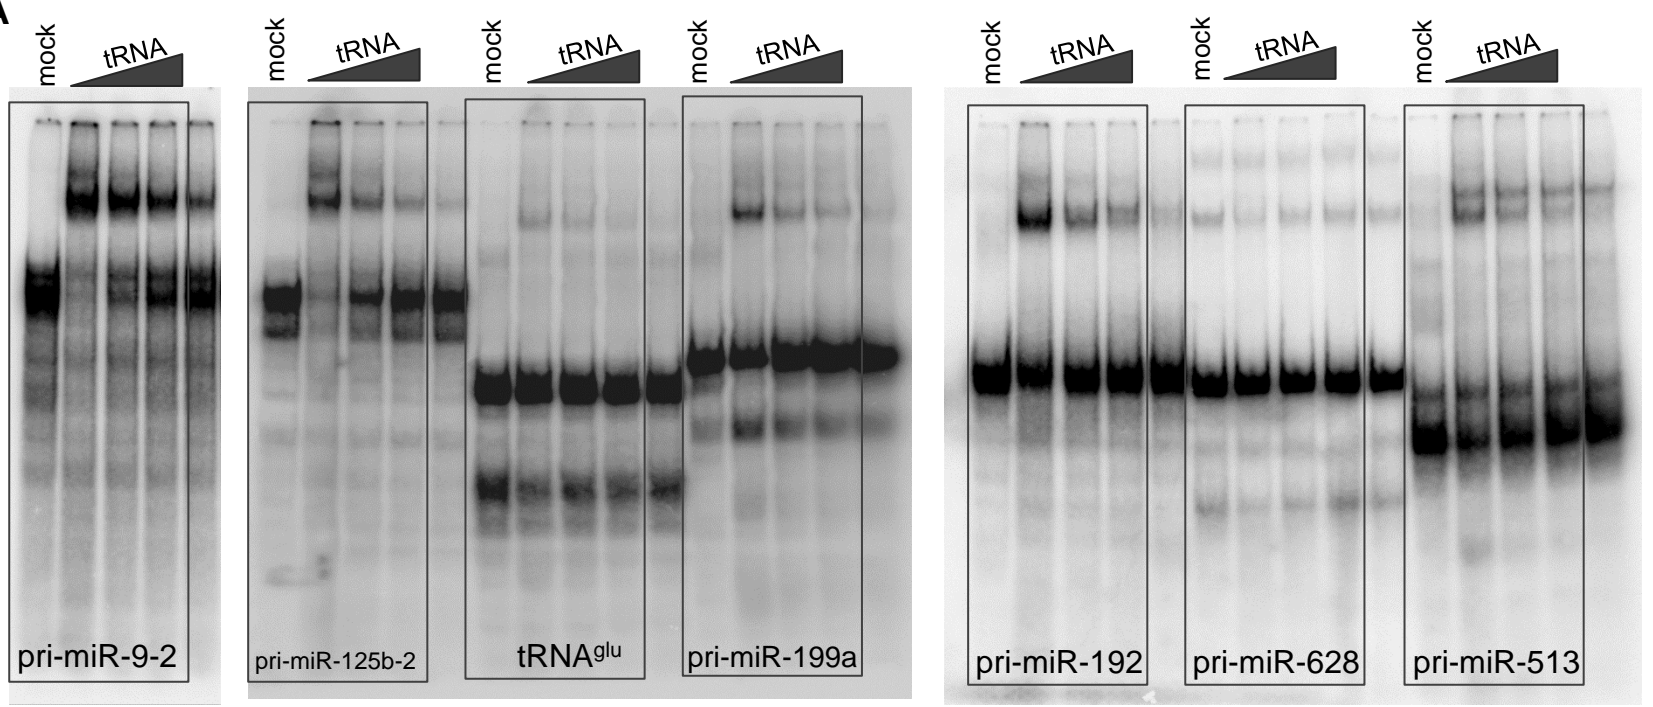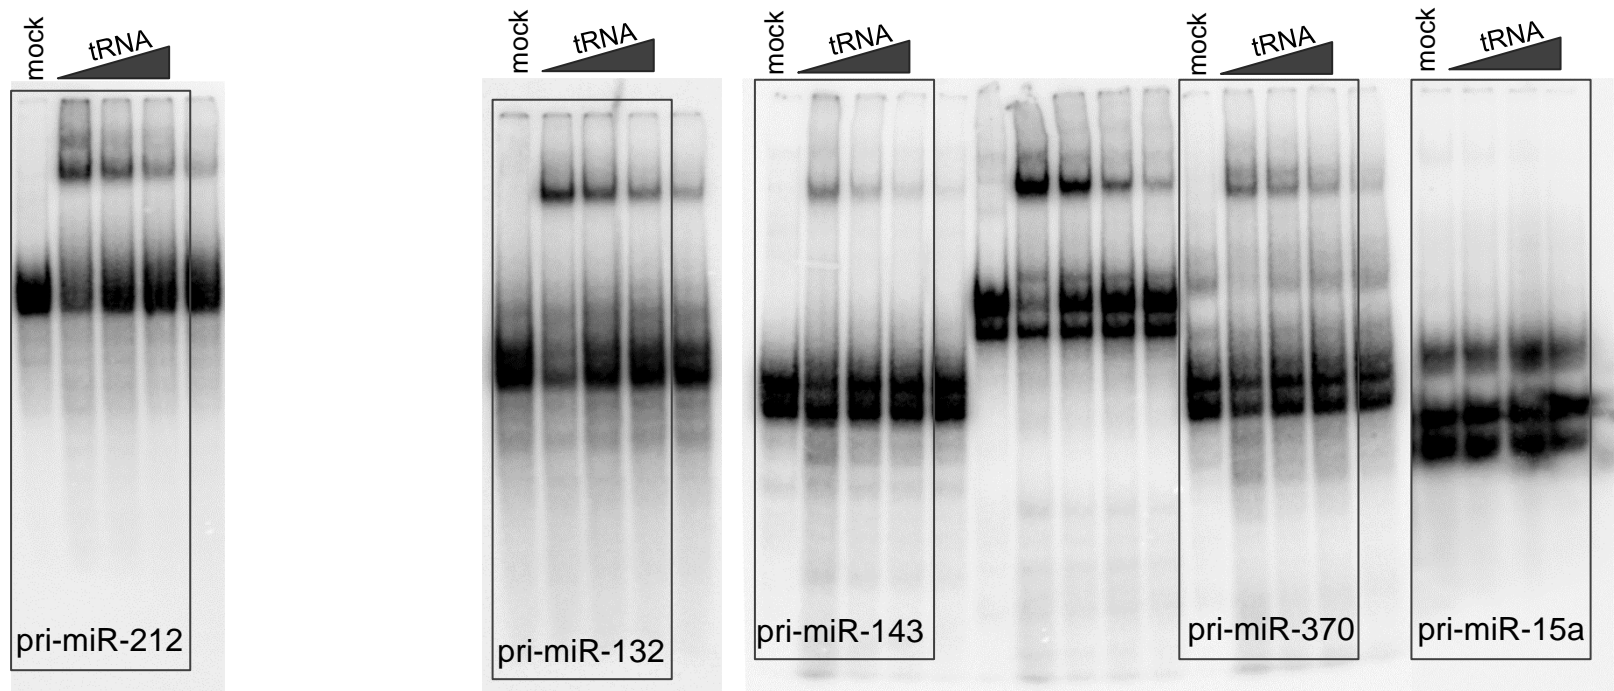

Supplement: emboj2012319s6.pdf [file emboj2012319s6.pdf]

**Figure 2B, 2C and 2D**

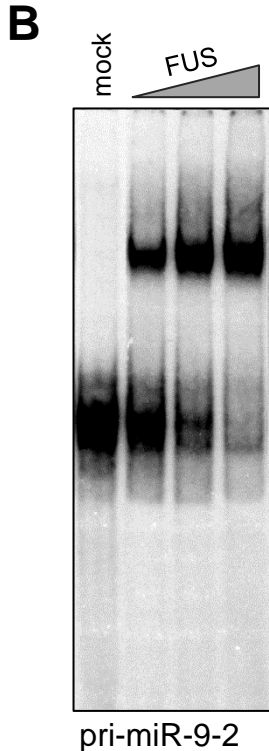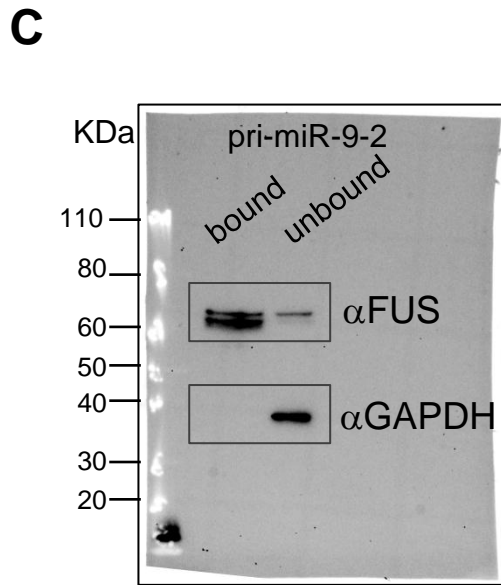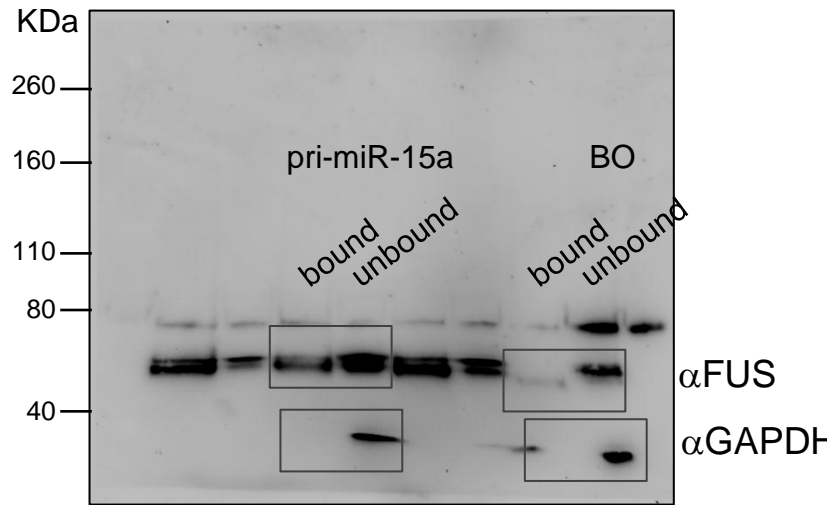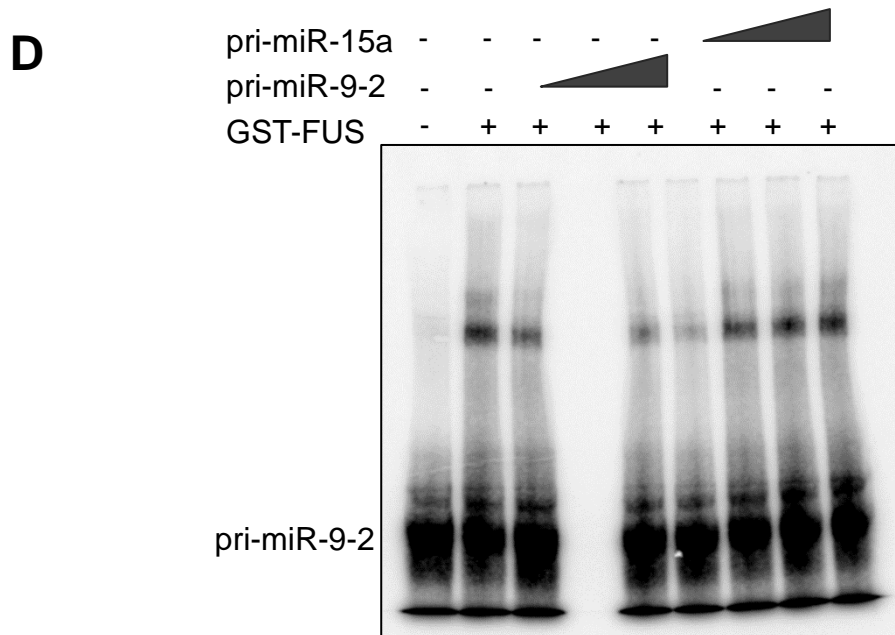

Supplement: emboj2012319s7.pdf [file emboj2012319s7.pdf]

Figure 3A

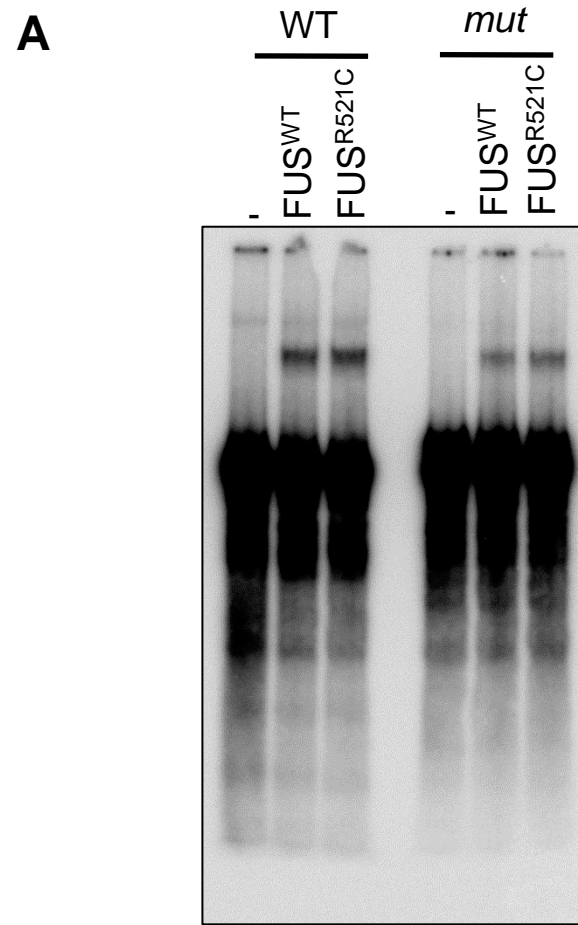

Supplement: emboj2012319s8.pdf [file emboj2012319s8.pdf]

**Figure 3B**

**B**

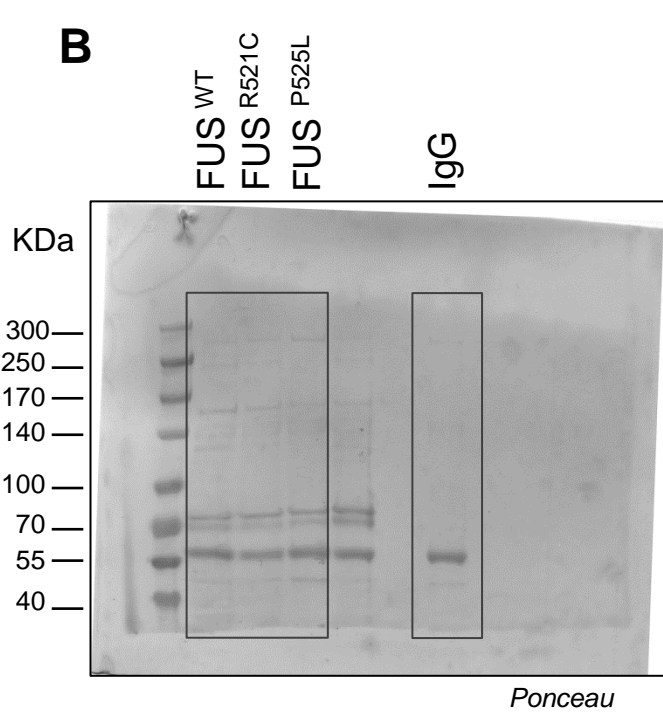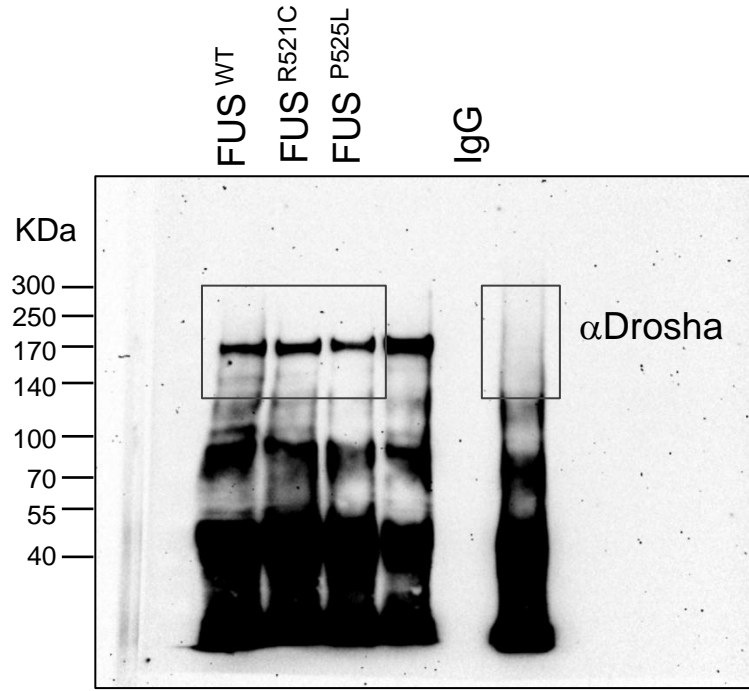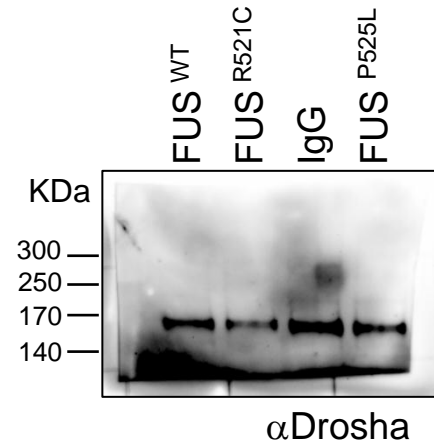

Supplement: emboj2012319s9.pdf [file emboj2012319s9.pdf]
